# Supplementary material
Source: Springer Nature journal article supplement (https://www.springermedizin.de/resource/supplementary/12913_2006_373_MOESM1_ESM.pdf/9535040)

### A. Varicose veins

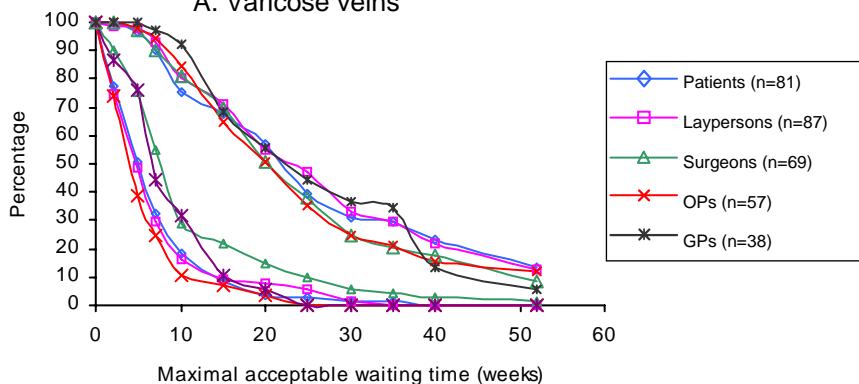

### B. Inguinal hernia

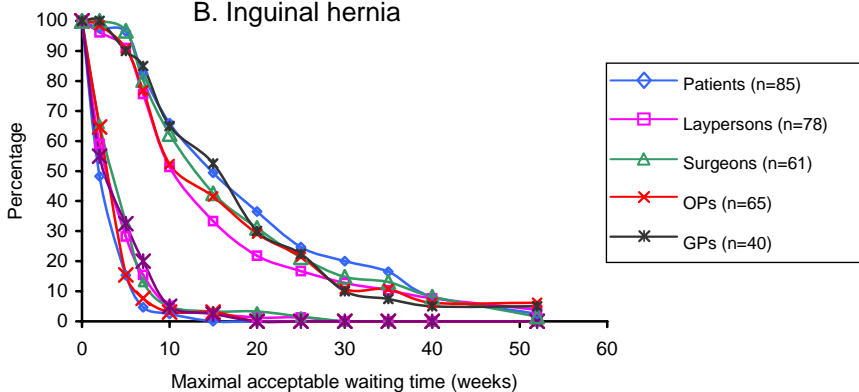

### C. Gallstones

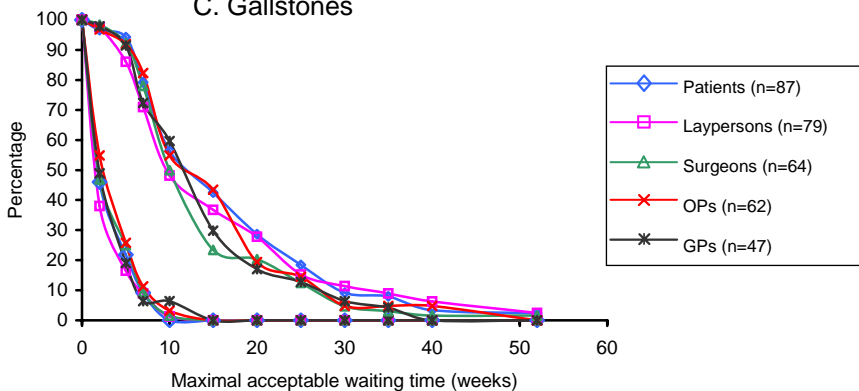

Supplement: MOESM1 [file 9535040]
